# Supplementary material
Source: Research Square preprint supplement (doi:10.21203/rs.3.rs-9395759/v1)
Supplement: Supplementary file 1 [file 33476d245fffedabffce8808.pdf]

## Supplementary Information

for

### Functional village types shape divergent rural ecological resilience trajectories in the Yangtze River Delta

**Supplementary Fig. S1.** Comparison of SHAP importance across the five functional village types for the trend model (A) and the level model (B). Bars represent the mean SHAP values of key predictors in each village type.

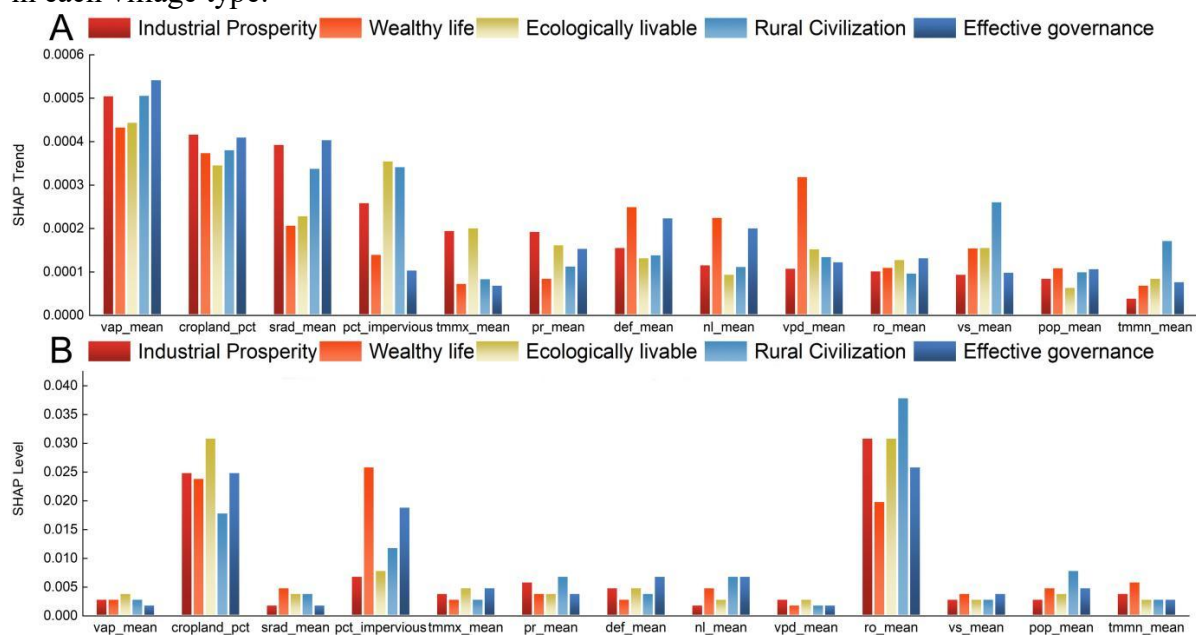

**Supplementary Table S1.** Functional types and village designations.

| Type (functional village type)               | Village designations                                                                                                                                                                      |
|----------------------------------------------|-------------------------------------------------------------------------------------------------------------------------------------------------------------------------------------------|
| industrial-prosperity villages (IP villages) | National Model Villages and Towns for Local Specialty Products<br>National Key Rural Tourism Villages<br>National Scenic Tourism Villages                                                 |
| ecologically livable villages (EL villages)  | National Forest Villages<br>China's Most Attractive Leisure Villages<br>China's Beautiful Leisure Villages<br>Top 100 Beautiful Villages in China<br>Model Beautiful and Livable Villages |
| rural-civilization villages (RC villages)    | Traditional Villages of China<br>Historic and Culturally Significant Villages of China<br>National Civilised Villages and Towns                                                           |
| effective-governance villages (EG villages)  | National Model Villages for Rural Governance<br>National Model Villages for Democracy and Rule of Law                                                                                     |
| wealthy-life villages (WL villages)          | National Model Villages with Billion-Yuan Specialty Industries<br>Taobao Villages                                                                                                         |

**Supplementary Table S2.** Predictive performance of type-specific XGBoost models (20% held-out validation set).

| Functional type (abbr.) | Mode | N (clean) | Train | Test | RMSE | MAE | R <sup>2</sup> |
|-------------------------|------|-----------|-------|------|------|-----|----------------|
|-------------------------|------|-----------|-------|------|------|-----|----------------|

|                            |       |      |      |     |          |          |          |
|----------------------------|-------|------|------|-----|----------|----------|----------|
| Industrial Prosperity (IP) | Level | 715  | 572  | 143 | 0.022049 | 0.015429 | 0.909099 |
| Industrial Prosperity (IP) | Trend | 712  | 569  | 143 | 0.001358 | 0.001009 | 0.445511 |
| Ecological Livability (EL) | Level | 1090 | 872  | 218 | 0.027351 | 0.016290 | 0.884180 |
| Ecological Livability (EL) | Trend | 1088 | 870  | 218 | 0.001214 | 0.000903 | 0.665450 |
| Rural Civilization (RC)    | Level | 1839 | 1471 | 368 | 0.024531 | 0.017045 | 0.919811 |
| Rural Civilization (RC)    | Trend | 1837 | 1469 | 368 | 0.001116 | 0.000841 | 0.708941 |
| Effective Governance (EG)  | Level | 767  | 613  | 154 | 0.025675 | 0.017181 | 0.897847 |
| Effective Governance (EG)  | Trend | 766  | 612  | 154 | 0.001392 | 0.000939 | 0.520831 |
| Wealthy Life (WL)          | Level | 962  | 769  | 193 | 0.025099 | 0.018162 | 0.880726 |
| Wealthy Life (WL)          | Trend | 959  | 767  | 192 | 0.001157 | 0.000875 | 0.589636 |

**Supplementary Table S3.** Ecological resilience indicator framework.

| System level          | Criterion level | Primary indicator                            | Secondary indicator                           |
|-----------------------|-----------------|----------------------------------------------|-----------------------------------------------|
| Ecological resilience | Resistance      | Ecosystem services                           | Water yield                                   |
| Ecological resilience | Resistance      | Ecosystem services                           | Soil retention                                |
| Ecological resilience | Resistance      | Ecosystem services                           | Carbon storage                                |
| Ecological resilience | Resistance      | Ecosystem services                           | Habitat quality                               |
| Ecological resilience | Adaptability    | Topographic exposure and landscape structure | Elevation                                     |
| Ecological resilience | Adaptability    | Topographic exposure and landscape structure | Slope                                         |
| Ecological resilience | Adaptability    | Topographic exposure and landscape structure | SHDI                                          |
| Ecological resilience | Adaptability    | Topographic exposure and landscape structure | SHEI                                          |
| Ecological resilience | Adaptability    | Topographic exposure and landscape structure | LPI                                           |
| Ecological resilience | Recovery        | NDVI                                         | Normalised Difference Vegetation Index (NDVI) |
| Ecological resilience | Recovery        | Vegetation cover                             | Green-area ratio (GR)                         |
| Ecological resilience | Recovery        | Water area ratio                             | Water-area ratio (WR)                         |

**Supplementary Table S4.** Mann–Kendall trend categories for ERI.

| Sen slope condition  | Mann–Kendall Z statistic | Trend category                    |
|----------------------|--------------------------|-----------------------------------|
| $\beta > 0$          | $ Z  > 1.96$             | Significant increase              |
| $\beta > 0$          | $ Z  \leq 1.96$          | Slight increase (non-significant) |
| $ \beta  \leq 0.001$ | $ Z  \leq 1.96$          | Stable (no significant trend)     |
| $\beta < 0$          | $ Z  \leq 1.96$          | Slight decrease (non-significant) |
| $\beta < 0$          | $ Z  > 1.96$             | Significant decrease              |
